# Supplementary material
Source: HighWire-hosted journal article supplement (http://jmg.bmjjournals.com/highwire/filestream/160750/field_highwire_adjunct_files/0/JMG_Supplement__083790.pdf)
Supplement: JMG_Supplement__083790.pdf [file JMG_Supplement__083790.pdf]

**Supplementary Table 1.** Summary of histological type and number of cancer cell lines screened for *DICER1* mutations

| <b>Tissue</b>                    | <b>Histology</b>                                | <b>Total Number of cell lines screened</b> | <b>Number of microsatellite stable cell lines screened</b> |
|----------------------------------|-------------------------------------------------|--------------------------------------------|------------------------------------------------------------|
| adrenal gland                    | adrenal cortical carcinoma                      | 2                                          | 2                                                          |
| autonomic ganglia                | neuroblastoma                                   | 35                                         | 35                                                         |
| biliary tract                    | bile duct/gallbladder carcinoma                 | 6                                          | 6                                                          |
| bone                             | osteosarcoma                                    | 9                                          | 8                                                          |
| bone                             | Ewings sarcoma/PNET                             | 20                                         | 20                                                         |
| bone                             | chondrosarcoma                                  | 1                                          | 1                                                          |
| bone                             | other                                           | 1                                          | 0                                                          |
| breast                           | carcinoma                                       | 45                                         | 42                                                         |
| central nervous system           | glioma                                          | 52                                         | 51                                                         |
| central nervous system           | primitive neuroectodermal tumor/medulloblastoma | 7                                          | 7                                                          |
| cervix                           | carcinoma                                       | 13                                         | 12                                                         |
| endometrium                      | carcinoma                                       | 10                                         | 4                                                          |
| eye                              | retinoblastoma                                  | 1                                          | 1                                                          |
| gastrointestinal tract           | carcinoma                                       | 1                                          | 1                                                          |
| haemopoietic and lymphoid tissue | haemopoietic neoplasm                           | 47                                         | 37                                                         |
| haemopoietic and lymphoid tissue | lymphoid neoplasm                               | 80                                         | 64                                                         |
| kidney                           | carcinoma                                       | 20                                         | 16                                                         |
| kidney                           | Wilms tumor                                     | 1                                          | 1                                                          |
| kidney                           | rhabdoid tumor                                  | 1                                          | 1                                                          |
| large intestine                  | carcinoma                                       | 40                                         | 24                                                         |
| liver                            | carcinoma                                       | 10                                         | 9                                                          |
| lung                             | carcinoma                                       | 150                                        | 137                                                        |
| lung                             | carcinoma endocrine tumor                       | 4                                          | 4                                                          |
| oesophagus                       | carcinoma                                       | 22                                         | 21                                                         |
| oesophagus                       | other                                           | 1                                          | 1                                                          |
| ovary                            | carcinoma                                       | 19                                         | 13                                                         |
| ovary                            | germ cell tumor                                 | 1                                          | 1                                                          |
| ovary                            | other                                           | 1                                          | 1                                                          |
| pancreas                         | carcinoma                                       | 17                                         | 16                                                         |
| placenta                         | choriocarcinoma                                 | 2                                          | 2                                                          |

|                           |                    |    |    |
|---------------------------|--------------------|----|----|
| pleura                    | mesothelioma       | 6  | 5  |
| prostate                  | carcinoma          | 4  | 1  |
| prostate                  | hyperplasia        | 1  | 1  |
| salivary gland            | carcinoma          | 1  | 1  |
| skin                      | malignant melanoma | 45 | 43 |
| skin                      | carcinoma          | 1  | 1  |
| skin                      | adnexal tumor      | 1  | 1  |
| small intestine           | carcinoma          | 1  | 1  |
| soft tissue               | rhabdomyosarcoma   | 7  | 5  |
| soft tissue               | sarcoma – other    | 11 | 10 |
| soft tissue               | leiomyoblastoma    | 1  | 1  |
| stomach                   | carcinoma          | 20 | 14 |
| stomach                   | other              | 1  | 1  |
| testis                    | germ cell tumor    | 4  | 4  |
| thyroid                   | carcinoma          | 12 | 11 |
| upper aerodigestive tract | carcinoma          | 22 | 21 |
| upper aerodigestive tract | other              | 1  | 1  |
| urinary tract             | carcinoma          | 18 | 17 |
| vulva                     | carcinoma          | 3  | 3  |
| unspecified               | carcinoma          | 2  | 2  |

**Supplementary Table 2.** Primers used to amplify *DICER1* coding exons.

| Exon  | Multiplex Group | Forward Primer Sequence (5'-3') | Reverse Primer Sequence (5'-3') | Size (bp) |
|-------|-----------------|---------------------------------|---------------------------------|-----------|
| 2     | B               | CCCTGCATGATTGTGTAATGG           | AGAAGTGGGAGGCCTGAAAG            | 343       |
| 3     | C               | TTTTGTAAATTTATTGGAGGACG         | TCTGCCAGAAGAGATTAATGAG          | 429       |
| 4     | A               | GAGGATAACCTTGGAAGTGTGG          | CCTAAATCAGACAACCAAGGC           | 388       |
| 5     | C               | AATCCTCACTTATGATAACAATGGC       | GCCAAACTCCCAATATTGATAAC         | 348       |
| 6     | A               | TAGTGGCATTTCACCAAAC             | ATTCTTACTCTTGCCCATTC            | 388       |
| 7     | A               | CCCACTGCTAACATTCTGGC            | GAGCCGCATTAAGCATATTTTC          | 395       |
| 8     | A               | AAATCCCAGTTAAACCCAC             | TGCAGCGCATCACATCAC              | 623       |
| 9     | B               | GACCAAGACCGTTTTGTTAGG           | GAGACCCTATGGGCACTTTG            | 333       |
| 10    | D               | CCCAAGAGCATGTGTGTCAG            | TTCTATGGATACAAAGAATAACAAAG      | 439       |
| 11    | C               | TGTAGGTACAGAGGCAGACAGC          | AACCGCAAAATGTCAACAATAC          | 323       |
| 12    | C               | CAAATTCAGTAGAGGGGAAGAG          | CAACACAAGGCTCCTGCTC             | 375       |
| 13    | B               | GGGCAGTGGTTTCATAGGTG            | TTAAGATCAGCAAGTGAATAGCTC        | 282       |
| 14    | B               | TCCAGGTCCTTCTAACATAGTTCTG       | GGAAGTGAATTTGATGTAGCG           | 307       |
| 15    | B               | GTCATGCCTCGGGTATTTTC            | ACAGAAATGATGCTTTCTAGTGG         | 475       |
| 16+17 | C               | CTAGAAAGCATCATTTCTGTTCTG        | ACCGTGCCCGACCTAGTG              | 648       |
| 18    | B               | TGTAAAGGTGCCATTTAGCTTC          | TTTGTGTGCAAAGCATCTCC            | 589       |
| 19    | C               | AGCCCAAGAGGCTGTAGTTG            | CGAATCATGCATTTAACTTGG           | 319       |
| 20    | A               | AAATCCCATTTGGCCTTAGAG           | TCTGACCTCAGATTCTCATCTCC         | 508       |
| 21a   | A               | AAATTCAAATTGCTGTTGCTCTC         | TTTGTTAGCATTTCCATCAAGG          | 553       |
| 21b   | C               | CTTTTGCCAAGGAAATCAGC            | CGTTCTCATCCTCTGAGATTATCC        | 557       |
| 22    | A               | CTTCTCAGTCATTCATAAGGAGTATG      | GCAAAACTCAAAGTCAAACATC          | 732       |
| 23a   | A               | TTGAAATTATCCATAACCCTTGC         | GCTGGTTAAATAGCAGCCC             | 609       |
| 23b   | B               | GACTTTGTGGTGGGGTTCTG            | TACAAGGCCAACACGATGAG            | 606       |
| 24    | B               | AATCTTCTTCGGATTTGGGG            | TGCCGTCAGAACTCTGAAAC            | 434       |
| 25+26 | C               | TCCAAGAAAAGAACTACATCTGTG        | AAATCTGACAACAGCACACCAC          | 537       |
| 27    | C               | TGCACACTAAATGCTGATTGAC          | CAACTTAAAGTCTTCCTTCCG           | 328       |

**Supplementary Table 3. *DICER1* non-pathogenic variants**

| <b>Nucleotide Change</b>       | <b>Protein Change</b> | <b>Frequency</b> |
|--------------------------------|-----------------------|------------------|
| <b>Non-synonymous variants</b> |                       |                  |
| c.20A>G                        | p.Q7R                 | 3                |
| c.1124C>G                      | p.P375R               | 1                |
| c.1381A>G                      | p.I461V               | 1                |
| c.2254G>A                      | p.A752T               | 1                |
| c.2614G>A                      | p.A872T               | 1                |
| c.3392A>G                      | p.N1131S              | 1                |
| c.4260_4262delGGA              | p.D1421del            | 5                |
| c.4802A>T                      | p.K1601M              | 1                |
| c.4891T>G                      | p.S1631A              | 4                |
| c.5740G>A                      | p.A1914T              | 1                |
| <b>Synonymous variants</b>     |                       |                  |
| c.126T>C                       | p.Y42Y                | 1                |
| c.366G>A                       | p.G122G               | 3                |
| c.1191C>T                      | p.S397S               | 1                |
| c.1887G>A                      | p.T629T               | 3                |
| c.1935G>A                      | p.P645P               | 7 (rs61751177)   |
| c.2115T>C                      | p.I705I               | 1                |
| c.2370G>A                      | p.R790R               | 1                |
| c.2658C>T                      | p.D886D               | 1                |
| c.2997T>G                      | p.L999L               | 7 (rs12018992)   |
| c.3033G>A                      | p.A1011A              | 4 (rs8019857)    |
| c.3198T>C                      | p.T1066T              | 3                |
| c.3213A>G                      | p.R1071R              | 1                |
| c.3813C>T                      | p.L1271L              | 1                |
| c.3820A>C                      | p.R1274R              | 1                |
| c.3972G>A                      | p.K1324K              | 3 (rs45562437)   |
| c.4014G>A                      | p.A1338A              | 3                |
| c.4647C>T                      | p.H1549H              | 1                |
| c.4665T>C                      | p.A1555A              | 1                |
| c.4680G>A                      | p.A1560A              | 4                |
| c.4776G>T                      | p.P1592P              | 1                |
| c.5112A>G                      | p.L1704L              | 1                |
| c.5145C>T                      | p.L1715L              | 4                |
| c.5643T>C                      | p.T1881T              | 1                |
| <b>Intronic variants</b>       |                       |                  |
| c.439-7A>T                     |                       | 3                |
| c.1377-4T>G                    |                       | 2                |
| c.4207-3C>T                    |                       | 1                |
| c.5769+4C>T                    |                       | 1                |
| c.5769+5G>A                    |                       | 1                |

**Supplementary Table 4.** *DICER1* variants identified in cancer cell lines

| Cell line | Tissue                      | Histology               | Microsatellite Instability | DNA change       | Protein change |
|-----------|-----------------------------|-------------------------|----------------------------|------------------|----------------|
| ZR-75-30  | breast                      | carcinoma               | yes                        | c.946_962del     | p.W316fs*15    |
| NCI-H2342 | lung                        | carcinoma               | yes                        | c.3349G>T        | p.E1117X       |
| IGROV-1   | ovary                       | carcinoma               | yes                        | c.4605_4606delTG | p.C1535fs*3    |
| MFE-296   | endometrium                 | carcinoma               | yes                        | c.5683C>T        | p.R1895X       |
| GR-ST     | haematopoietic and lymphoid | haematopoietic neoplasm | yes                        | c.653A>G         | p.E218G        |
| TK10      | kidney                      | carcinoma               | no                         | c.835A>T         | p.N279Y        |
| HCT-116   | large intestine             | carcinoma               | yes                        | c.862G>A         | p.V288I        |
| LS-411N   | large intestine             | carcinoma               | yes                        | c.920G>A         | p.R307H        |
| HT-3      | cervix                      | carcinoma               | no                         | c.1213A>C        | p.N405H        |
| HCC2998   | colorectal                  | carcinoma               | no                         | c.1402G>A        | p.D468N        |
| HCT-15    | large intestine             | carcinoma               | yes                        | c.1483G>A        | p.E495K        |
| CP66-MEL  | skin                        | malignant melanoma      | no                         | c.1504G>A        | p.E502K        |
| Ca9-22    | upper aerodigestive tract   | carcinoma               | no                         | c.2033C>T        | p.S678F        |
| LAN-6     | autonomic ganglia           | neuroblastoma           | no                         | c.2237G>C        | p.R746T        |
| NCI-H1770 | lung                        | carcinoma               | no                         | c.2612A>G        | p.D871G        |
| KYSE-520  | oesophagus                  | carcinoma               | no                         | c.3334A>G        | p.N1112D       |
| NCI-H1975 | lung                        | carcinoma               | no                         | c.3379A>T        | p.I1127F       |
| NCI-H1838 | lung                        | carcinoma               | no                         | c.3631G>T        | p.V1211L       |
| HEC-1     | endometrium                 | carcinoma               | yes                        | c.3673T>C        | p.Y1225H       |
| HCT-15    | large intestine             | carcinoma               | yes                        | c.3839G>A        | p.S1280N       |
| SK-MES-1  | lung                        | carcinoma               | no                         | c.4123G>A        | p.D1375N       |
| PF-382    | haematopoietic and lymphoid | lymphoid malignancy     | no                         | c.4339C>A        | p.Q1447K       |
| ES4       | bone                        | Ewings sarcoma          | no                         | c.4474A>G        | p.M1492V       |
| HCC2998   | large intestine             | carcinoma               | no                         | c.5001A>C        | p.E1667D       |
| NCI-H1522 | lung                        | carcinoma               | yes                        | c.5108G>A        | p.R1703H       |
| UACC-257  | skin                        | malignant melanoma      | no                         | c.5620T>C        | p.Y1874H       |

**Supplementary Figure 1.** Constitutional *DICER1* mutations in 19 families

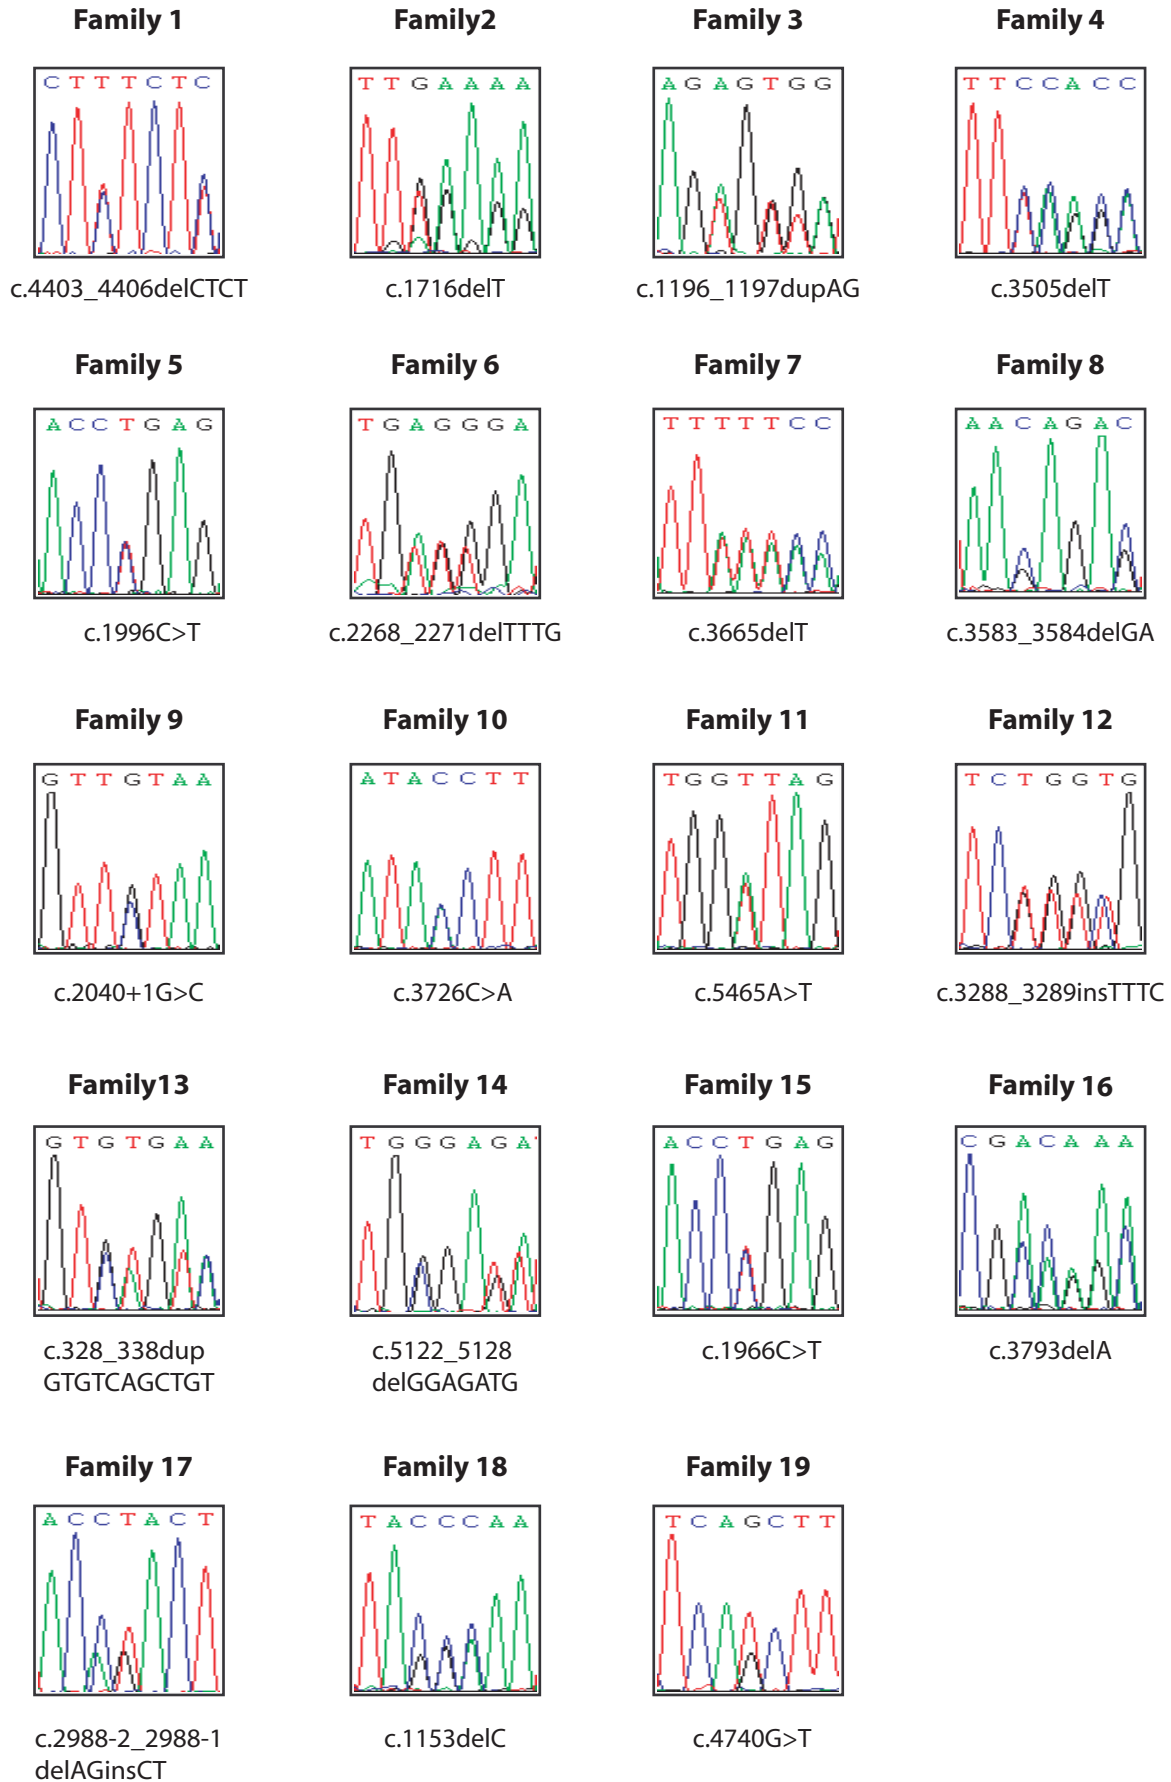

## **APPENDIX**

The FACT case series were recruited from the Paediatric Oncology Departments at the following centres. The lead co-ordinators for each centre are listed but we gratefully acknowledge all the clinical professionals involved in case recruitment at each centre:

Aberdeen (M. Connon), Birmingham (J. Cooper and B. Morland), Bristol (S. Peters, R. Elson and M. Stevens), Cambridge (J. Tunnacliffe and A. Burke), Cardiff (J. Powell and H. Traunecker), Dublin (C. Rooney, A. O'Meara, M. Capra and J. Pears), Glasgow (W. Taylor and E Simpson), Great Ormond Street Hospital (K. Howe and G. Levitt), Leeds (U. Reid and A. Glaser), Liverpool (S. Hemsworth and H. McDowell), Manchester (L. Auld, C. Beane, B. Brennan and J. Birch), The Royal Marsden Hospital (R. Browning and K. Pritchard-Jones), Newcastle (L. Price and J. Hale), Nottingham (J. Evans, L. Whiles and D. Walker), Oxford (J. Coaker, K. Ashton and C. Mitchell), Southampton (J. Grout and M. Radford), Sheffield (M. Gerrard).
